# Supplementary material for: CoQ10 bioaccessibility and Caco-2 cell uptake improved with novel medium chain triglyceride encapsulation
Source: Royal Society of Chemistry journal article supplement (doi:10.1039/d4fo02844a), 2024-01-01
Supplement: d4fo02844a1.pdf [file d4fo02844a1.pdf]

## 1 Supplemental Materials

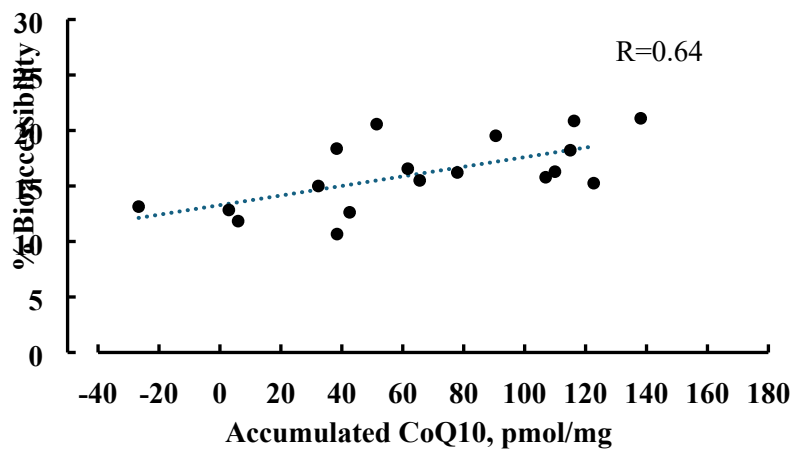

2

3 **Figure S1.** Correlation between % bioaccessibility and accumulated CoQ10 in Caco-2 cells, as  
4 determined using Pearson's correlation.

5

6 **Table S1 Raw data of Figure 1**

| <b>Sample</b> | <b>CoQ10 starting dose (mg)</b> | <b>Micellarized CoQ10 (mg)</b> | <b>Bioaccessibility (%)</b> |
|---------------|---------------------------------|--------------------------------|-----------------------------|
| Control1      | 2.05                            | 0.27                           | 13.14                       |
| Control2      | 2.05                            | 0.26                           | 12.84                       |
| Control3      | 2.05                            | 0.24                           | 11.83                       |
| Control4      | 2.05                            | 0.26                           | 12.63                       |
| Control5      | 2.05                            | 0.31                           | 15.00                       |
| Control6      | 2.05                            | 0.22                           | 10.67                       |
| VitaDry1      | 2.01                            | 0.39                           | 19.53                       |
| VitaDry2      | 2.01                            | 0.33                           | 16.29                       |
| VitaDry3      | 2.01                            | 0.33                           | 16.56                       |
| VitaDry4      | 2.01                            | 0.37                           | 18.22                       |
| VitaDry5      | 2.01                            | 0.42                           | 20.86                       |
| VitaDry6      | 2.01                            | 0.33                           | 16.22                       |
| VitaSperse1   | 2.00                            | 0.42                           | 21.10                       |
| VitaSperse2   | 2.00                            | 0.41                           | 20.57                       |
| VitaSperse3   | 2.00                            | 0.32                           | 15.79                       |
| VitaSperse4   | 2.00                            | 0.37                           | 18.37                       |
| VitaSperse5   | 2.00                            | 0.31                           | 15.50                       |
| VitaSperse6   | 2.00                            | 0.31                           | 15.25                       |

7

8 **Table S2. Raw data of Figure 2**

| <b>Sample</b>        | <b>Cell protein<br/>(mg)</b> | <b>Total CoQ10<br/>(pmol)</b> | <b>pmol CoQ10/mg protein</b> |
|----------------------|------------------------------|-------------------------------|------------------------------|
| Cell blank_DMEM+PBS1 | 1.56                         | 340.19                        | 218.53                       |
| Cell blank_DMEM+PBS2 | 1.12                         | 221.87                        | 198.40                       |
| Cell blank_DMEM+PBS3 | 1.22                         | 311.60                        | 256.46                       |
| Cell blank_DMEM+PBS4 | 1.16                         | 302.62                        | 262.01                       |
| Cell blank_DMEM+PBS5 | 1.10                         | 252.70                        | 230.77                       |
| Cell blank_DMEM+PBS6 | 1.37                         | 348.35                        | 254.58                       |
| Cell_Control1        | 1.67                         | 350.63                        | 210.11                       |
| Cell_Control2        | 1.57                         | 376.87                        | 239.71                       |
| Cell_Control3        | 1.62                         | 393.40                        | 242.76                       |
| Cell_Control4        | 1.54                         | 429.88                        | 279.36                       |
| Cell_Control5        | 1.47                         | 396.14                        | 269.08                       |
| Cell_Control6        | 1.60                         | 439.57                        | 275.22                       |
| Cell_VitaDry1        | 1.63                         | 532.60                        | 327.32                       |
| Cell_VitaDry2        | 1.53                         | 528.95                        | 346.74                       |
| Cell_VitaDry3        | 1.65                         | 492.57                        | 298.43                       |
| Cell_VitaDry4        | 1.56                         | 550.11                        | 351.77                       |
| Cell_VitaDry5        | 1.60                         | 566.17                        | 353.01                       |
| Cell_VitaDry6        | 1.66                         | 523.61                        | 314.70                       |
| Cell_VitaSperse1     | 1.49                         | 557.52                        | 374.89                       |
| Cell_VitaSperse2     | 1.89                         | 543.92                        | 288.22                       |
| Cell_VitaSperse3     | 1.54                         | 527.74                        | 343.69                       |
| Cell_VitaSperse4     | 1.92                         | 527.87                        | 275.10                       |
| Cell_VitaSperse5     | 1.65                         | 499.04                        | 302.35                       |
| Cell_VitaSperse6     | 1.47                         | 527.98                        | 359.46                       |

9
